# Supplementary material
Source: PubMed Central journal article supplement (PMC193582)

Fig. 3

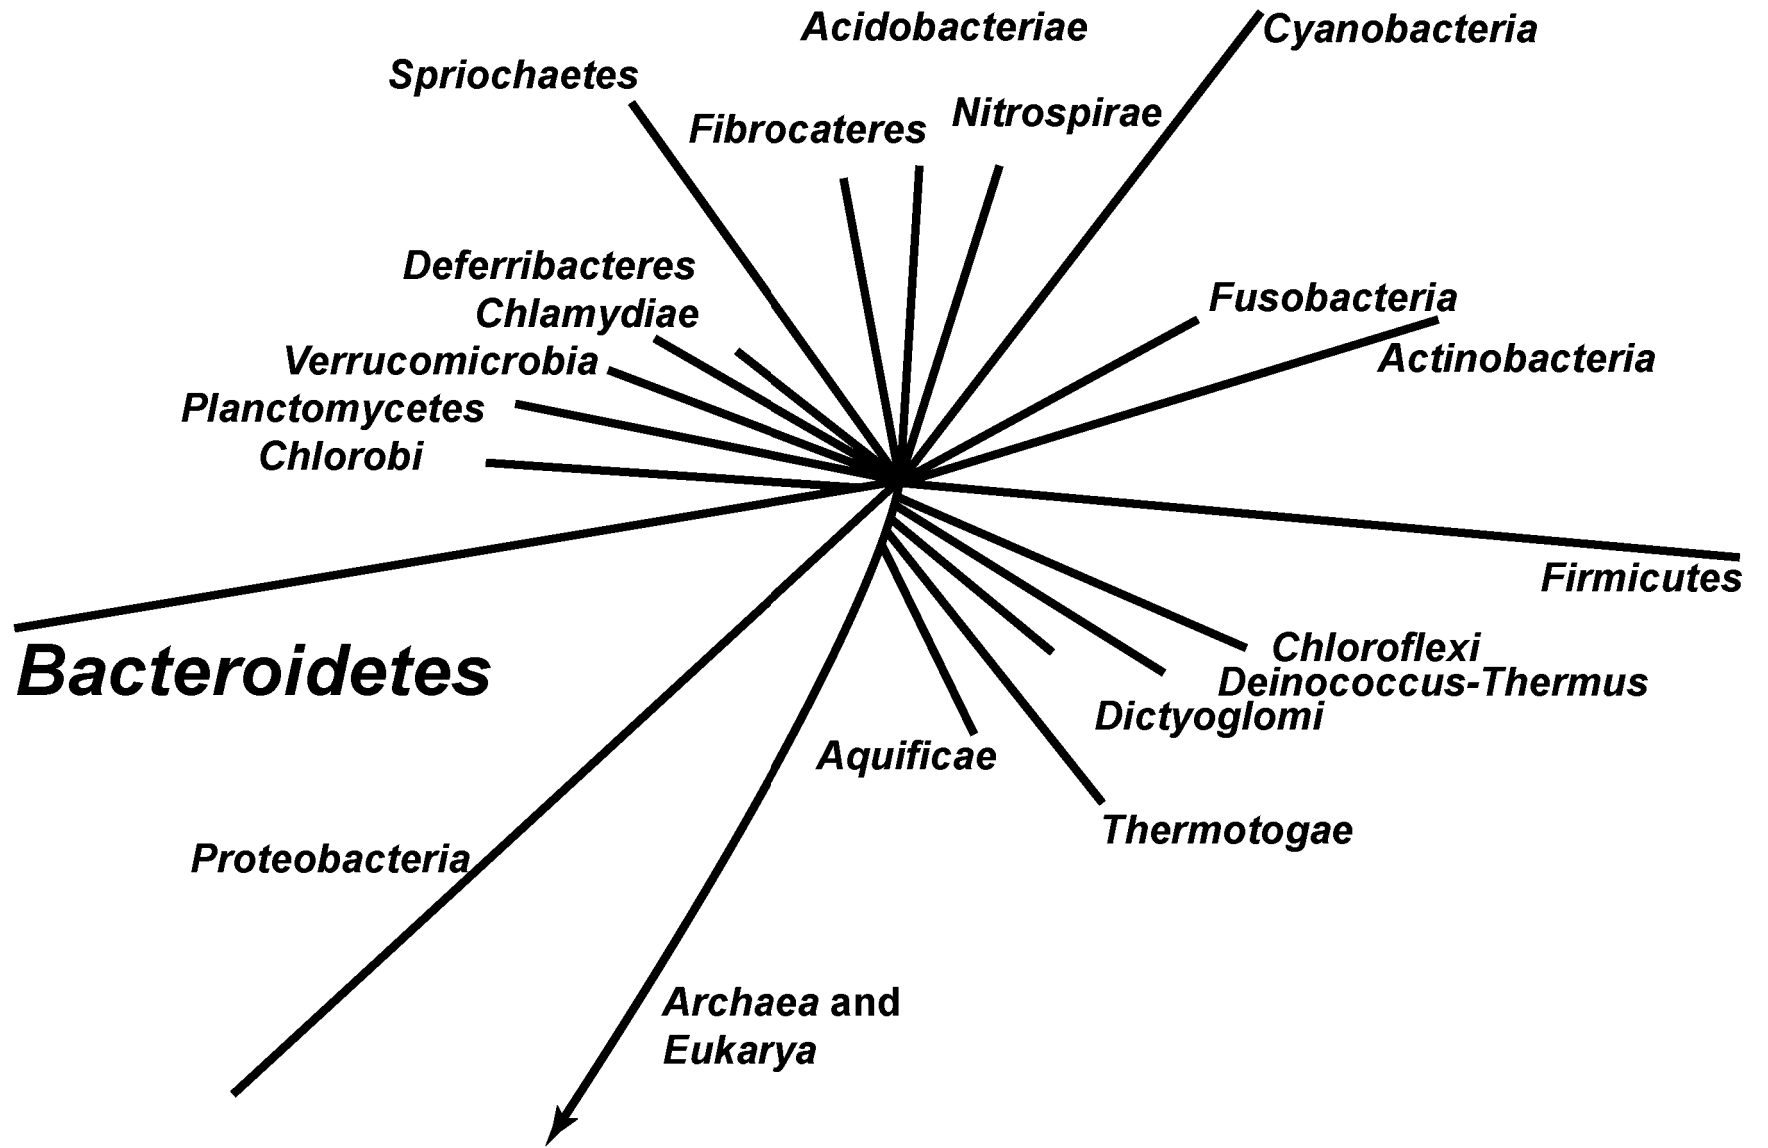

Supplement: pnas_1734063100_2.pdf [file pnas_1734063100_2.pdf]

Fig. 4

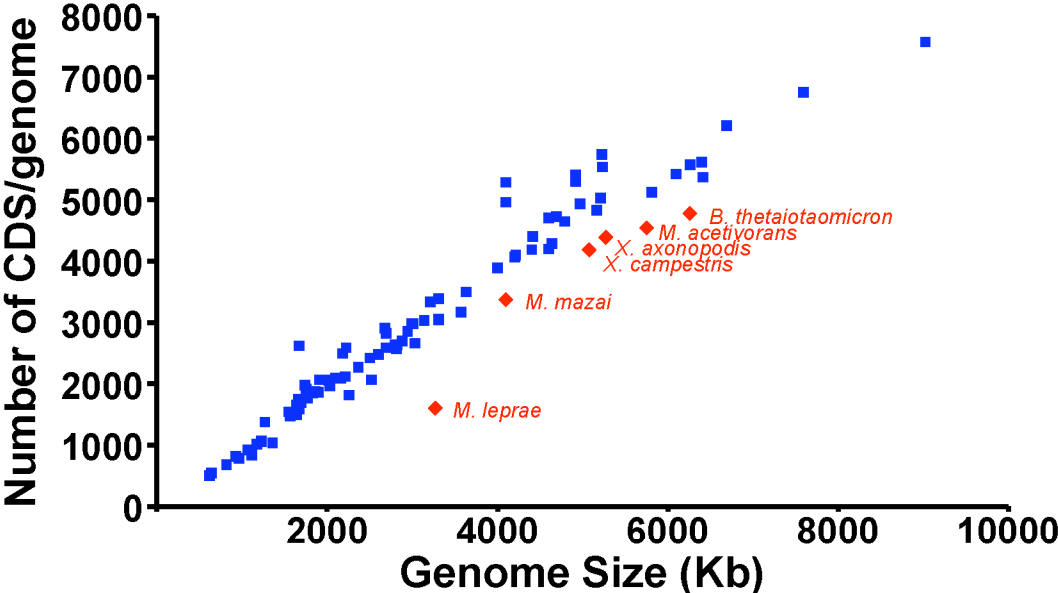

Supplement: pnas_1734063100_4.pdf [file pnas_1734063100_4.pdf]

Fig. 5

# *Bacteroides thetaiotaomicron* VPI 5482 Genome

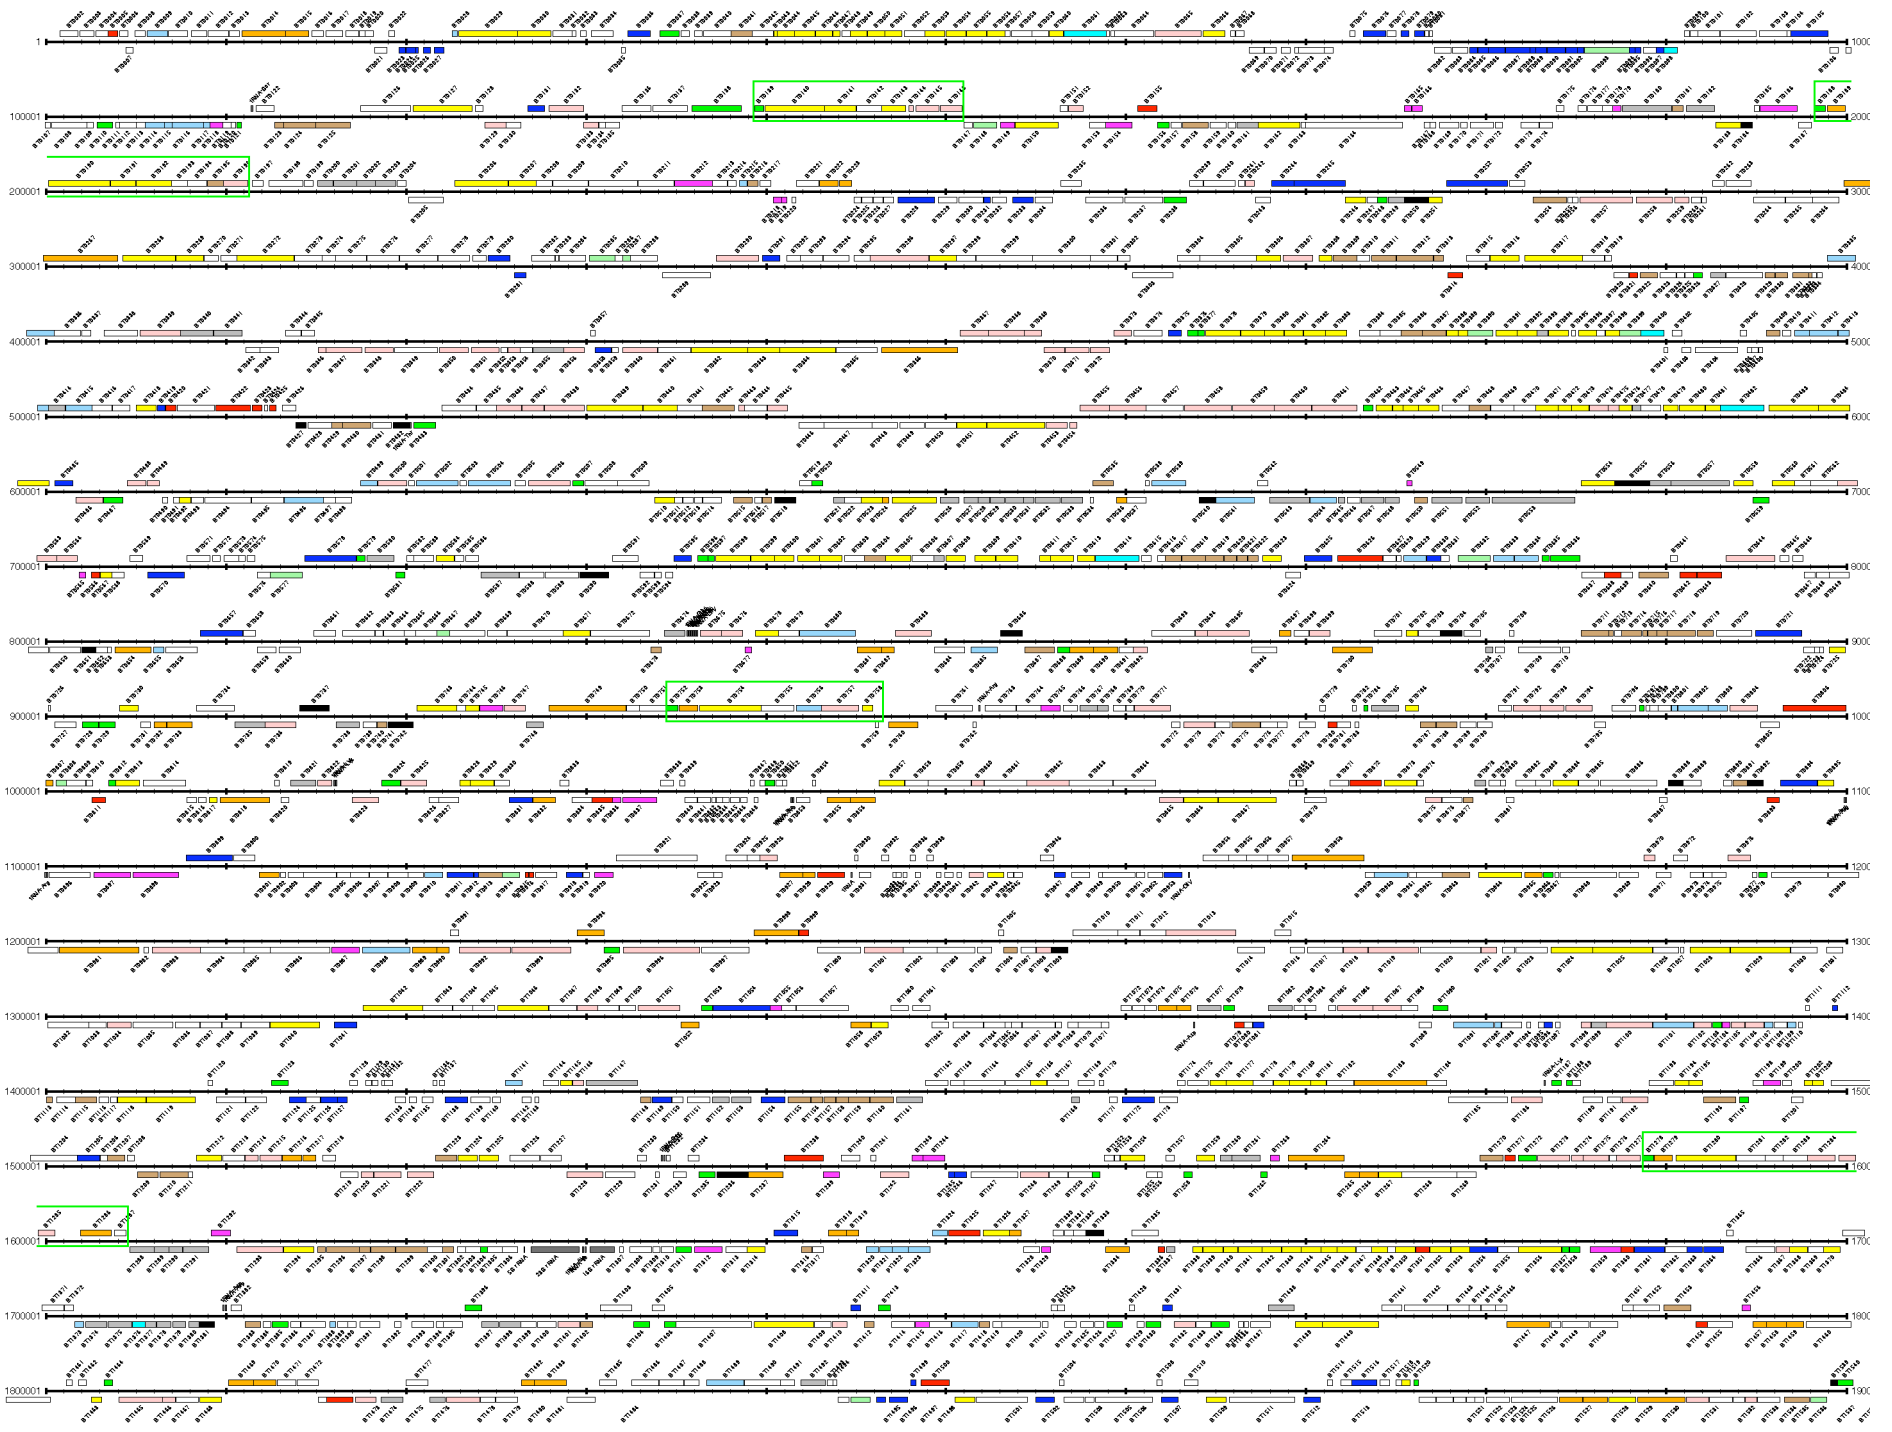



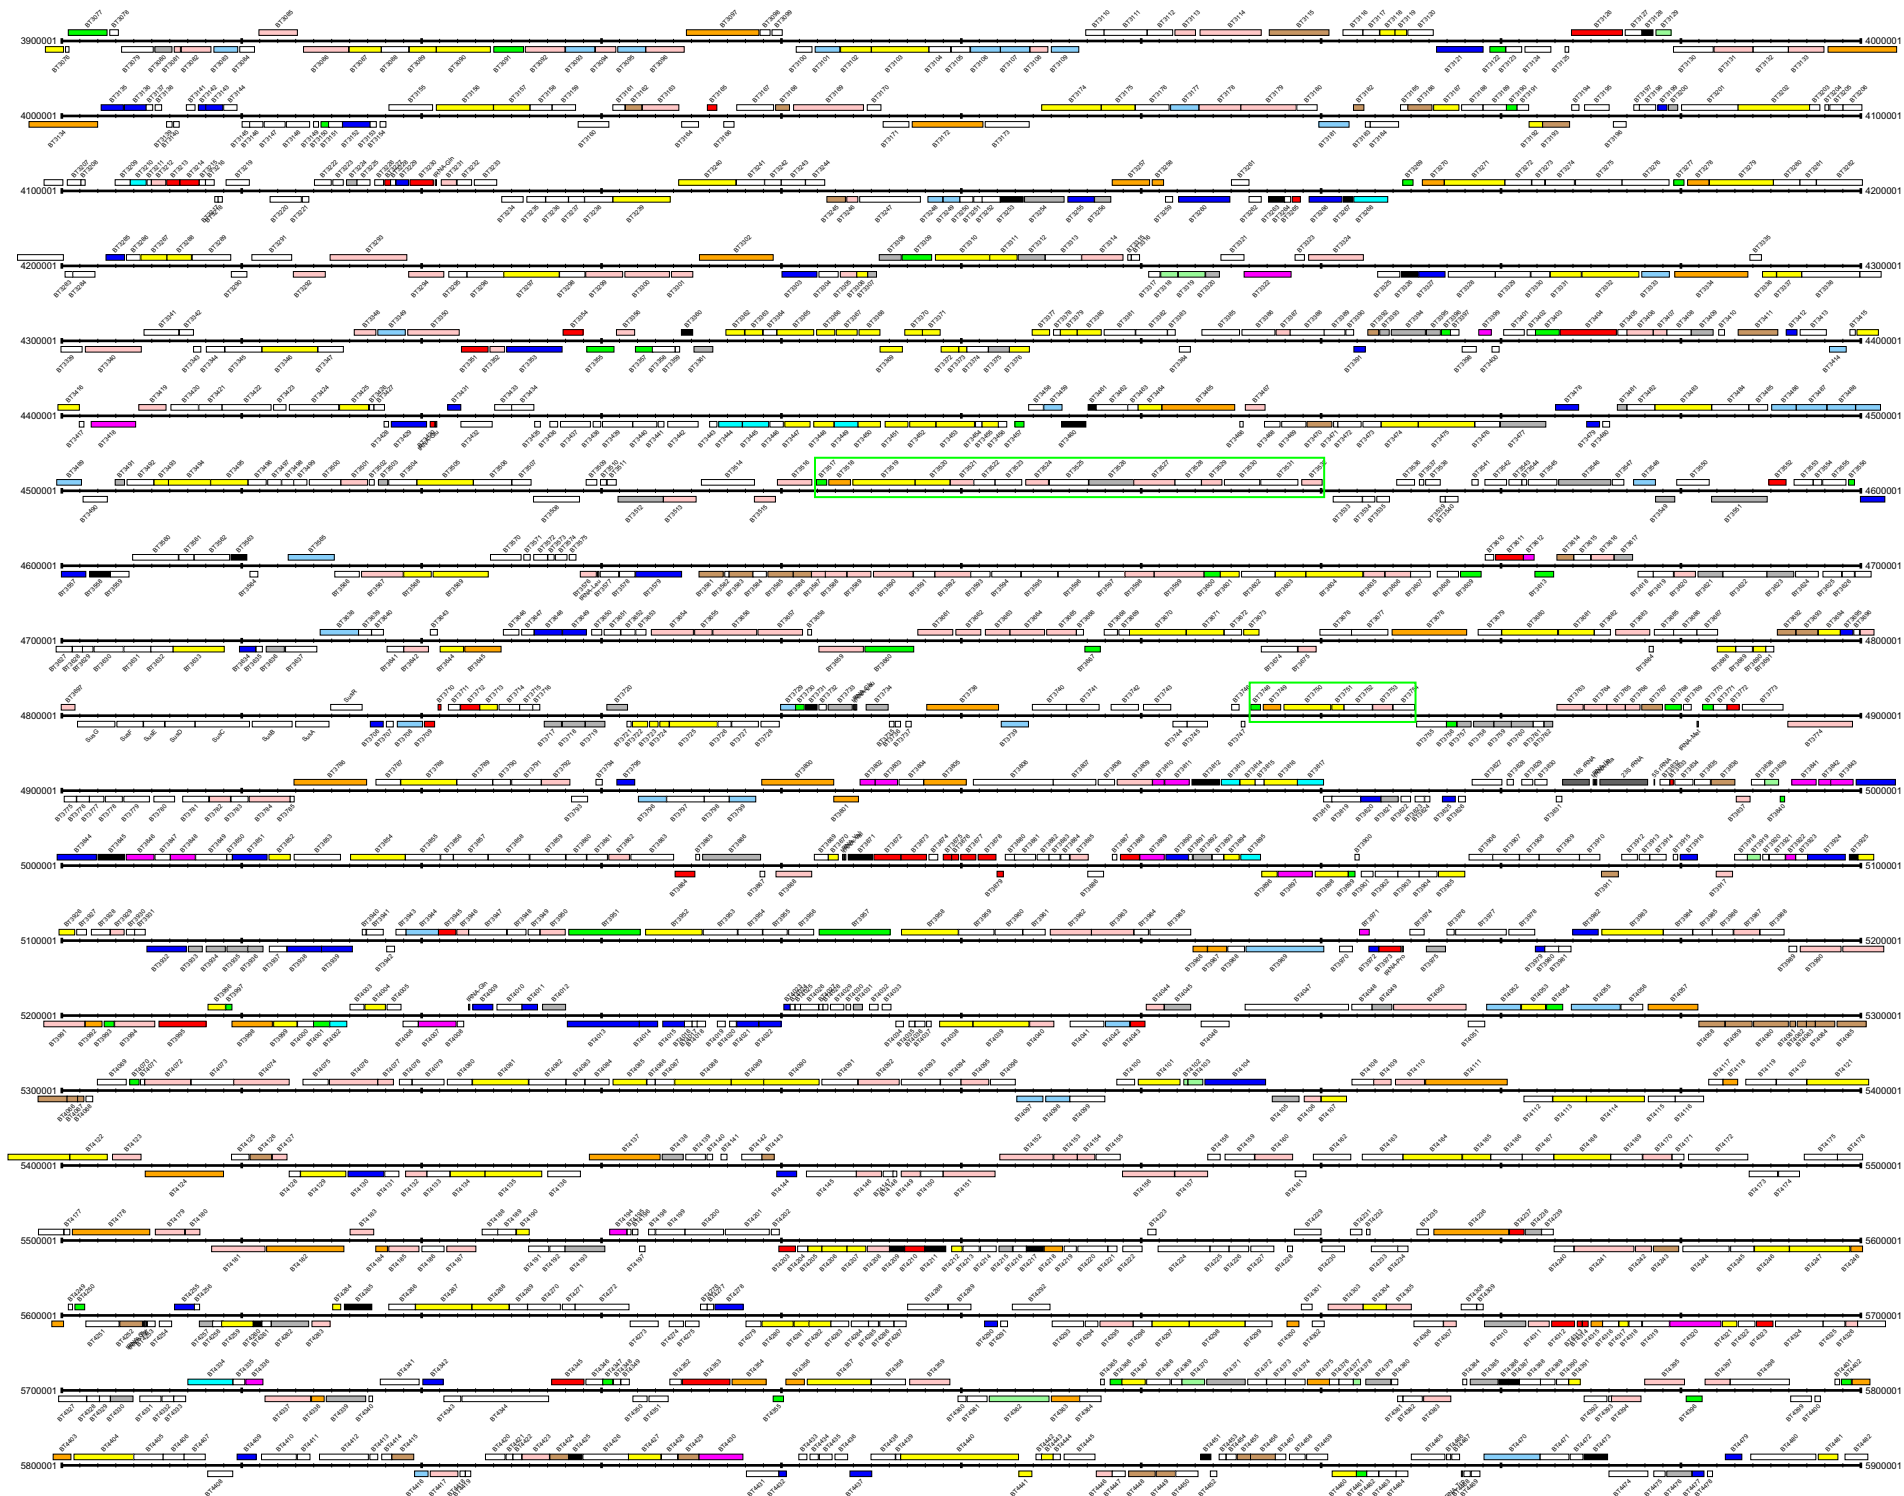

Supplement: pnas_1734063100_7.pdf [file pnas_1734063100_7.pdf]

Fig. 6

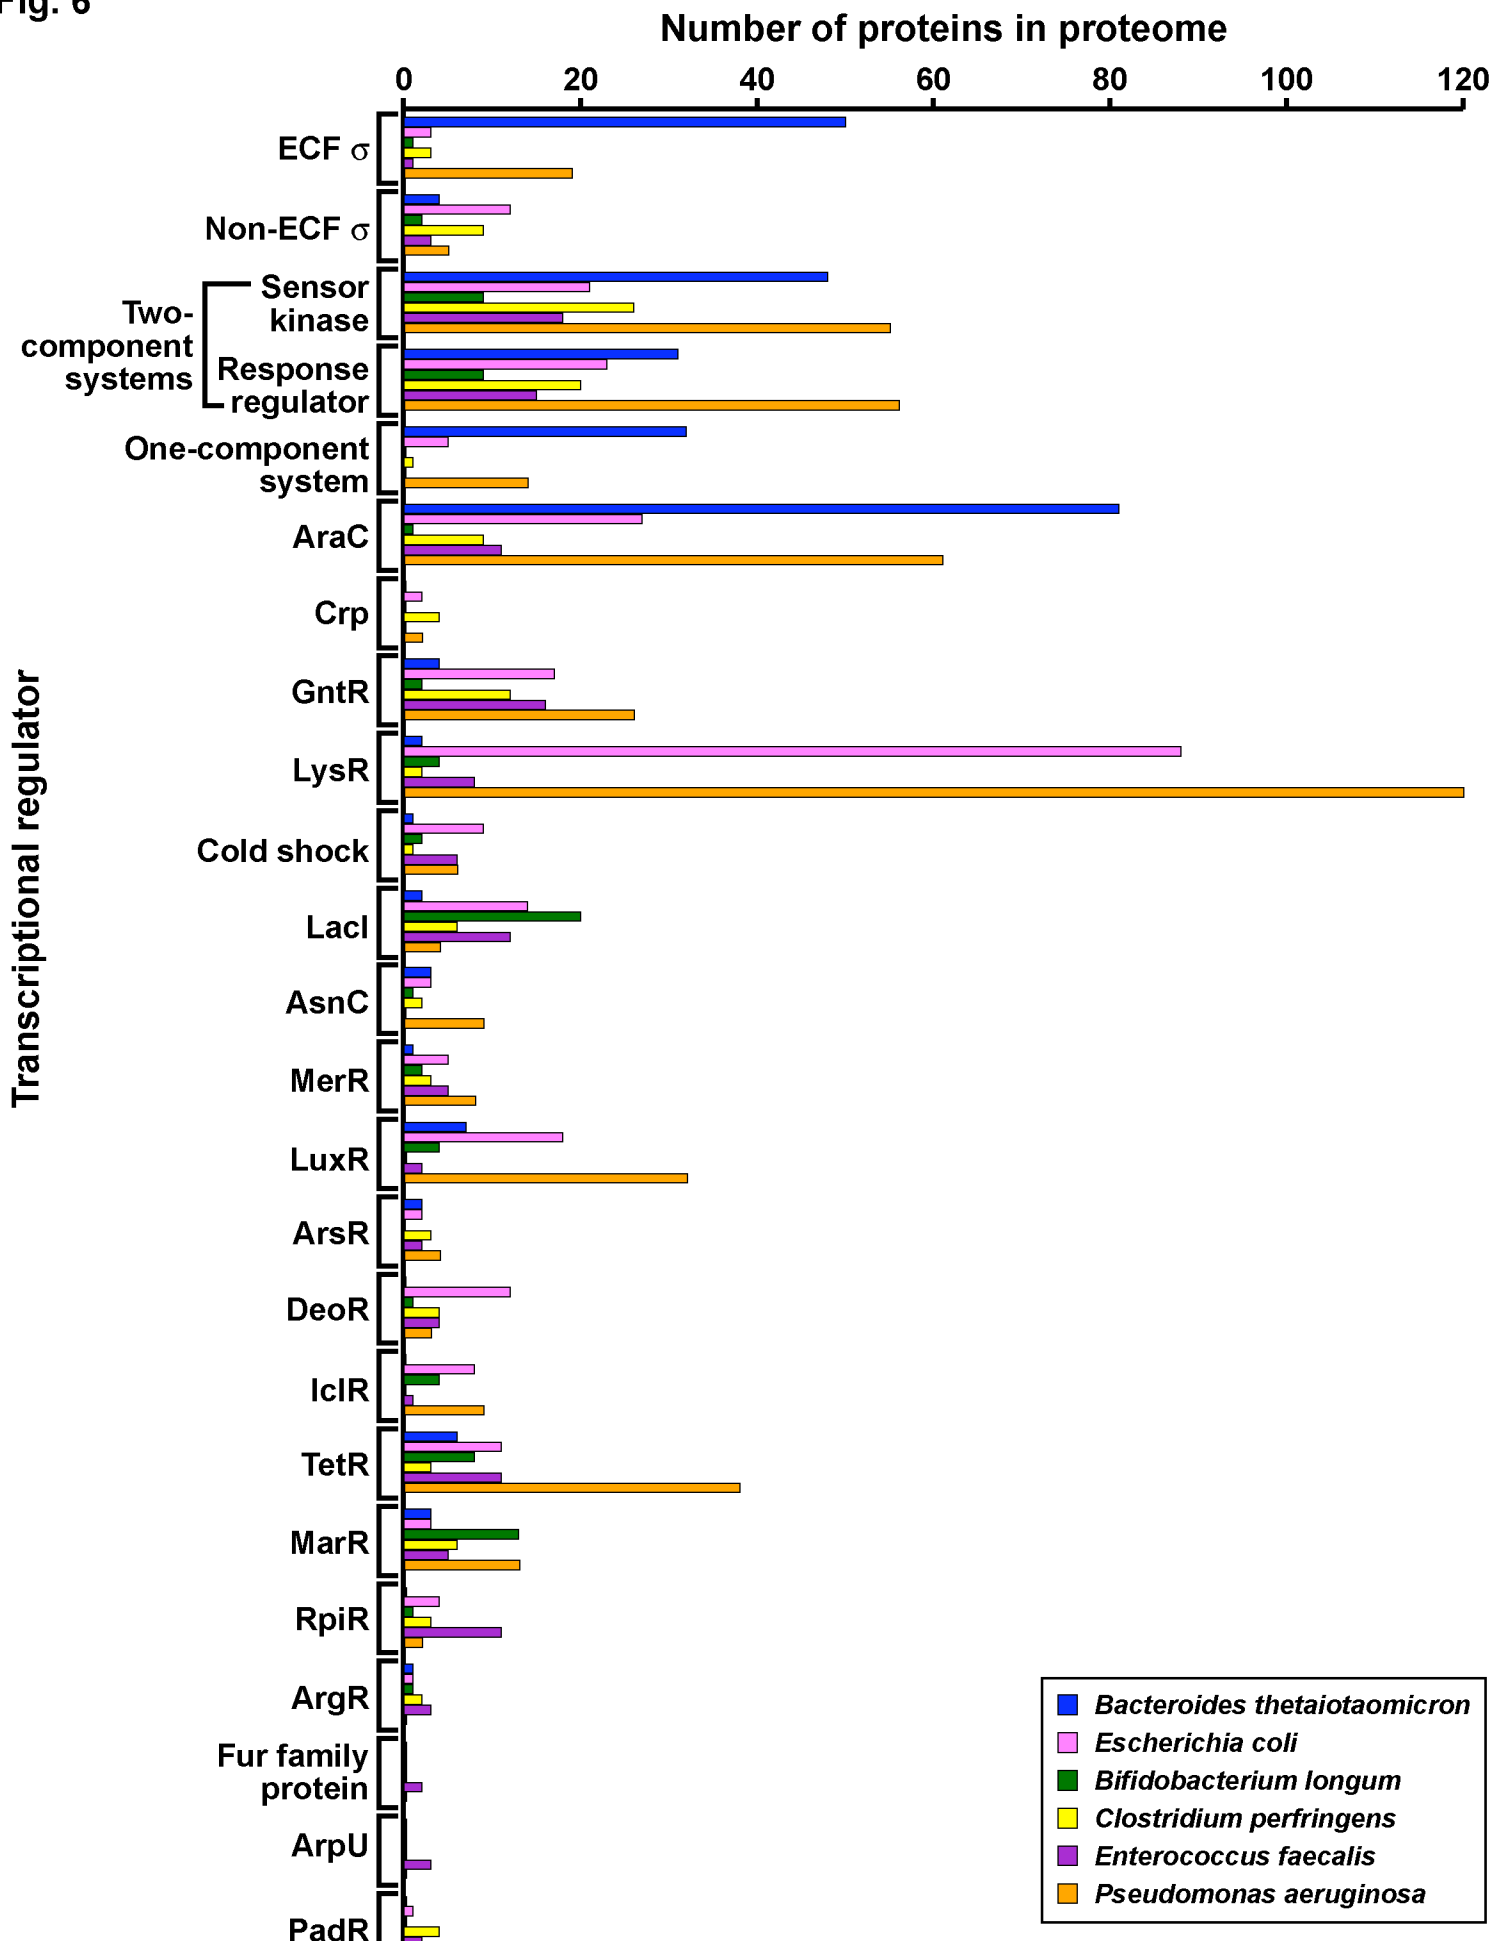

Supplement: pnas_1734063100_9.pdf [file pnas_1734063100_9.pdf]
